# Supplementary material for: Complex nodal structure phonons formed by open and closed nodal lines in CoAsS and Na2CuP solids
Source: Royal Society of Chemistry journal article supplement (doi:10.1039/d2cp01992b), 2022-01-01
Supplement: d2cp01992b1.pdf [file d2cp01992b1.pdf]

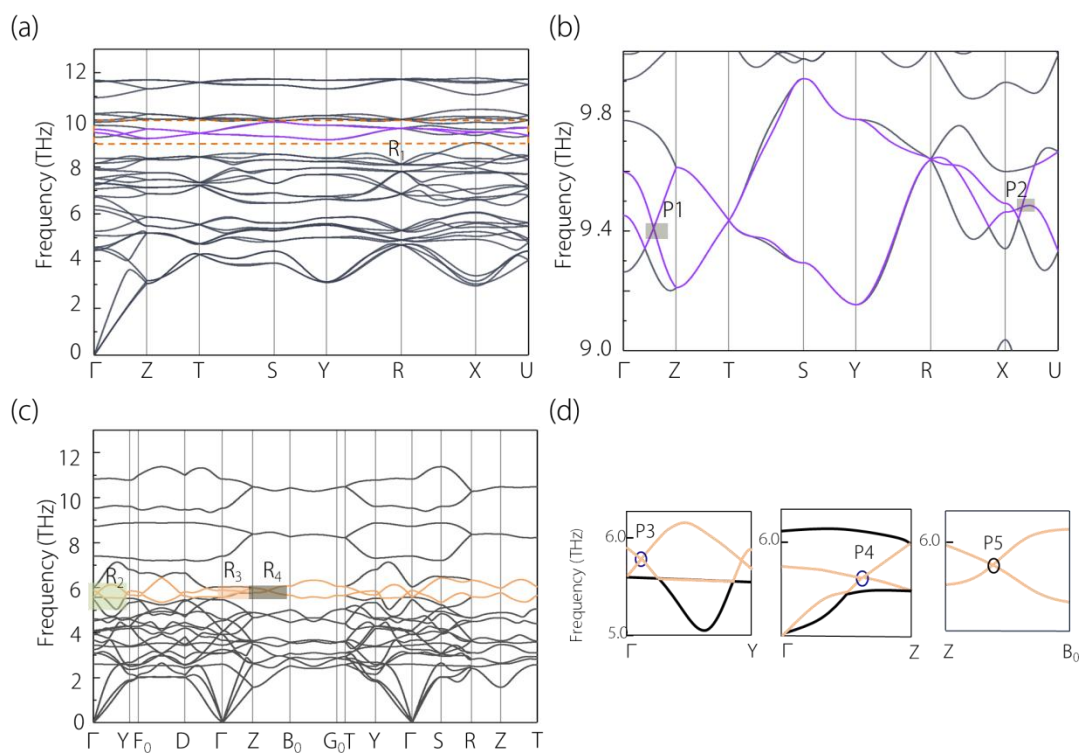

Figure S1. (a) Phonon dispersion of CoAsS along the high-symmetry paths. (b) The enlarged phonon dispersion around the 9.5 THz frequency. (c) Phonon dispersion of Na<sub>2</sub>CuP along the high-symmetry paths. (b) The enlarged phonon dispersions around the frequency of 5.8 THz. In (a)-(d), the SOC is considered.
